# New genes and functional innovation in mammals

José Luis Villanueva-Cañas<sup>1,#</sup>, Jorge Ruiz-Orera<sup>1</sup>, M.Isabel Agea<sup>1</sup>, Maria Gallo<sup>2</sup>, David Andreu<sup>2</sup>,  
M.Mar Albà<sup>1,2,3,\*</sup>

<sup>1</sup>Evolutionary Genomics Group, Research Programme in Biomedical Informatics, Hospital del Mar  
5 Research Institute (IMIM), Barcelona, Spain; <sup>2</sup>Department of Experimental and Health Sciences,  
Universitat Pompeu Fabra (UPF), Barcelona, Spain; <sup>3</sup>Catalan Institution for Research and Advanced  
Studies (ICREA), Barcelona, Spain.

Key words: *de novo* gene, species-specific genes, orphan gene, lineage-specific gene, evolutionary  
innovation, adaptive evolution, mammals

10 Running title: New genes in mammals

<sup>#</sup>Current address: Institute of Evolutionary Biology (CSIC-Universitat Pompeu Fabra), Barcelona, Spain

\* Corresponding author: malba@imim.es

## ABSTRACT

The birth of genes that encode new proteins is a major source of evolutionary innovation. However, we still understand relatively little about how these genes come into being and which functions they are selected for. Here we address this question by generating a comprehensive list of mammalian-specific gene families and analysing their properties. We combine gene annotations and *de novo* transcript assemblies from 30 mammalian species, obtaining about 6,000 families with varying degrees of conservation across the mammalian phylogeny. We show that the families which arose early in mammalian evolution (basal) are relatively well-characterized. These families are enriched in secreted proteins and include milk and skin polypeptides, immune response components, and proteins involved in spermatogenesis. In contrast, there is a gap in knowledge of the functions of proteins which are specific of certain groups or species (young), despite the fact that they also have extensive proteomics support. Interestingly, we find that both young and basal mammalian-specific gene families show similar tissue-specific gene expression biases, with a marked enrichment in testis. Proteins from both groups tend to be short and depleted in aromatic and negatively charged residues. This indicates shared mechanisms of formation and suggests that the youngest proteins may have been retained for similar kinds of functions as the older ones. We identify several previously described cases of genes originated *de novo* from non-coding genomic regions, supporting the idea that this mechanism frequently underlies the evolution of new protein-coding genes. The catalogue of gene families generated here provides a unique resource for future studies on the role of new genes in mammalian-specific adaptations.

## INTRODUCTION

The genome and mRNA sequencing efforts of the last two decades have resulted in gene catalogues for a large number of species (Genome 10K Community of Scientists. 2009; Lindblad-Toh et al. 2011; Flicek et al. 2014). This has spurred the comparison of genes across species and the identification of a surprisingly large number of proteins that appear to be limited to one species or lineage (Wood et al. 2002; Domazet-Lošo and Tautz 2003; Albà and Castresana 2005; Milde et al. 2009; Tautz and Domazet-Lošo 2011; Toll-Riera, Bostick, et al. 2012; Neme and Tautz 2013; Wissler et al. 2013; Arendsee et al. 2014; Palmieri et al. 2014; Schlötterer 2015). Although these proteins probably hold the key to many recent adaptations (Zhang and Long 2014), they remain, for the most part, still uncharacterized (McLysaght and Hurst 2016).

Species- or lineage-specific genes, sometimes referred to as orphan genes, are defined by their lack of homologues in other species. They may arise by rearrangements of already existing coding sequences, often including partially duplicated genes and/or transposable elements (Zhang et al. 2004; Toll-Riera et al. 2009; M Toll-Riera et al. 2011), or completely *de novo* from previously non-coding genomic regions (Levine et al. 2006; Cai et al. 2008; Heinen et al. 2009; Knowles and McLysaght 2009; Toll-Riera et al. 2009; Tautz and Domazet-Lošo 2011; Wu et al. 2011; Reinhardt et al. 2013; McLysaght and Hurst 2016). The latter process is facilitated by the high transcriptional turnover of the genome, which continuously produces transcripts that can potentially acquire new functions and become novel protein coding-genes (Zhao et al. 2014; Ruiz-Orera et al. 2015; Neme and Tautz 2016).

Lineage-specific genes are expected to be major drivers of evolutionary innovation. A well-known example is the nematocyst in Cnidaria, which is used to inject toxin into their preys. Some of the major constituents of the nematocyst are Cnidaria-specific proteins, indicating that the birth of new genes in a Cnidaria ancestor was intimately linked to the emergence of a novel trait (Milde et al. 2009). Lineage- or species-specific genes also comprise a large proportion of the proteins specific of Molluscs shells (Aguilera et al. 2017). In mammals, diverse adaptations have also been related to new genes. The caseins, which transport calcium in the milk, have originated from duplications of calcium-binding phosphoprotein which have undergone very drastic sequence changes (Kawasaki et al. 2011).

In mammals, there have been a number of systematic studies aimed at the identification of recently evolved genes, particularly in human and to a lesser extent mouse (Knowles and McLysaght 2009; Toll-

Riera et al. 2009; Wu et al. 2011; Murphy and McLysaght 2012; Neme and Tautz 2013; Guerzoni and McLysaght 2016). These works have been very valuable in understanding the origin of new genes, providing some of the first examples of *de novo* gene evolution. However, our knowledge of how these genes have impacted mammalian biology has lagged behind. To fill this gap we have generated a comprehensive list of gene families which have originated at different times during the evolution of mammals. By combining gene expression data, functional annotation, proteomics, and amino acid sequence properties we obtain a much more complete picture of the biology underlying the birth of new genes in mammals.

## RESULTS

### Identification of mammalian-specific gene families

Our first goal was to build a comprehensive catalogue of mammalian-specific protein-coding gene families. To ensure consistency, our analysis was based on 30 mammalian species for which we had the genome sequence, a complete set of gene annotations and RNA sequencing data (RNA-Seq) (Table S1). The RNA-Seq data was used to assemble transcripts *de novo*, which provided a source of expressed sequences for each species that was independent of the gene annotations and which served to complement them.

First, in each of the 30 species, we selected the genes that did not have homologues in non-mammalian species using BLASTP sequence similarity searches against a panel of 34 species including vertebrates, insects, plants, fungi, and bacteria (Table S1). Subsequently, we eliminated any genes that had initially been classified as mammalian-specific, but had indirect homology, through paralogues, in more distant species. This was done to minimize the inclusion of very rapidly evolving duplicated genes (Toll-Riera et al. 2009).

Next, we used the remaining mammalian-specific genes in each species to perform all against all sequence similarity searches. We clustered the genes into families by iteratively inspecting the lists of sequence similarity hits until no more homologues could be added to a given family. Then we assigned each family to the node that connected the most distant species present in the family. This node was the point from which no further ancestors could be traced back. It represented the time period at which the new gene family had originated.

A method that relies solely on gene annotations is likely to miss homologues in the species which are not very well annotated. For this reason we performed additional searches of all members of a family against the novel transcripts generated with the RNA-Seq data. In most families the use of RNA-Seq data expanded the range of species with evidence of expression of the gene (Figure S1). In some cases it also resulted in a deepening of the node of origin; approximately 22% of the genes initially classified as species-specific were reclassified into multi-species families. To ensure robustness, in each node we only considered the gene families that contained sequences from at least half of the species derived from that node. The procedure resulted in 2,034 multi-species gene families, altogether containing 10,991 different proteins. We also obtained 3,972 species-specific families, containing 4,173 different proteins. The complete catalogue of gene families, protein sequences, and transcript assemblies is provided as supplementary material.

Figure 1 shows the distribution of gene families in the different nodes of the mammalian tree. About one fourth of the families (439) had a basal distribution, they had originated before the split of the major mammalian groups, probably more than 100 Million years ago (class 'mam-basal' or 2; nodes 1, 2, 4, 5 and 6 in Figure S2). The rest of multi-species families corresponded to more recent nodes and were classified as 'mam-young (class 1). This included, for example, the 269 families which were specific of the Catarrhini (old World monkeys, node 21 in Figure S2). These genes were present in macaque and/or baboon, and in the great apes, but were absent from other primate or mammalian branches. Other examples of large sets of phylogenetically-restricted gene families corresponded to the primates (135 families, node 7), the muridae (173 families, node 23) or the felids (52 families, node 14).

Our dataset included several previously described mammalian-specific genes. One example was neuronatin, an imprinted mammalian-specific gene involved in the regulation of ion channels during brain development (Evans et al. 2005). We found members of this family in 26 placental species but not in marsupials or Monotremata. Another example was the abundant antimicrobial salivary peptide mucin-7 (Bobek and Situ 2003). This gene likely originated in a placental mammal ancestor and evolved under positive selection in response to pathogens (Xu et al. 2016). Another example was dermcidin, an antimicrobial peptide secreted in the skin and previously found to be primate-specific (Toll-Riera et al. 2009). An illustrative list of genes, including these examples and other cases discussed in the next sections, is available from Table 1.

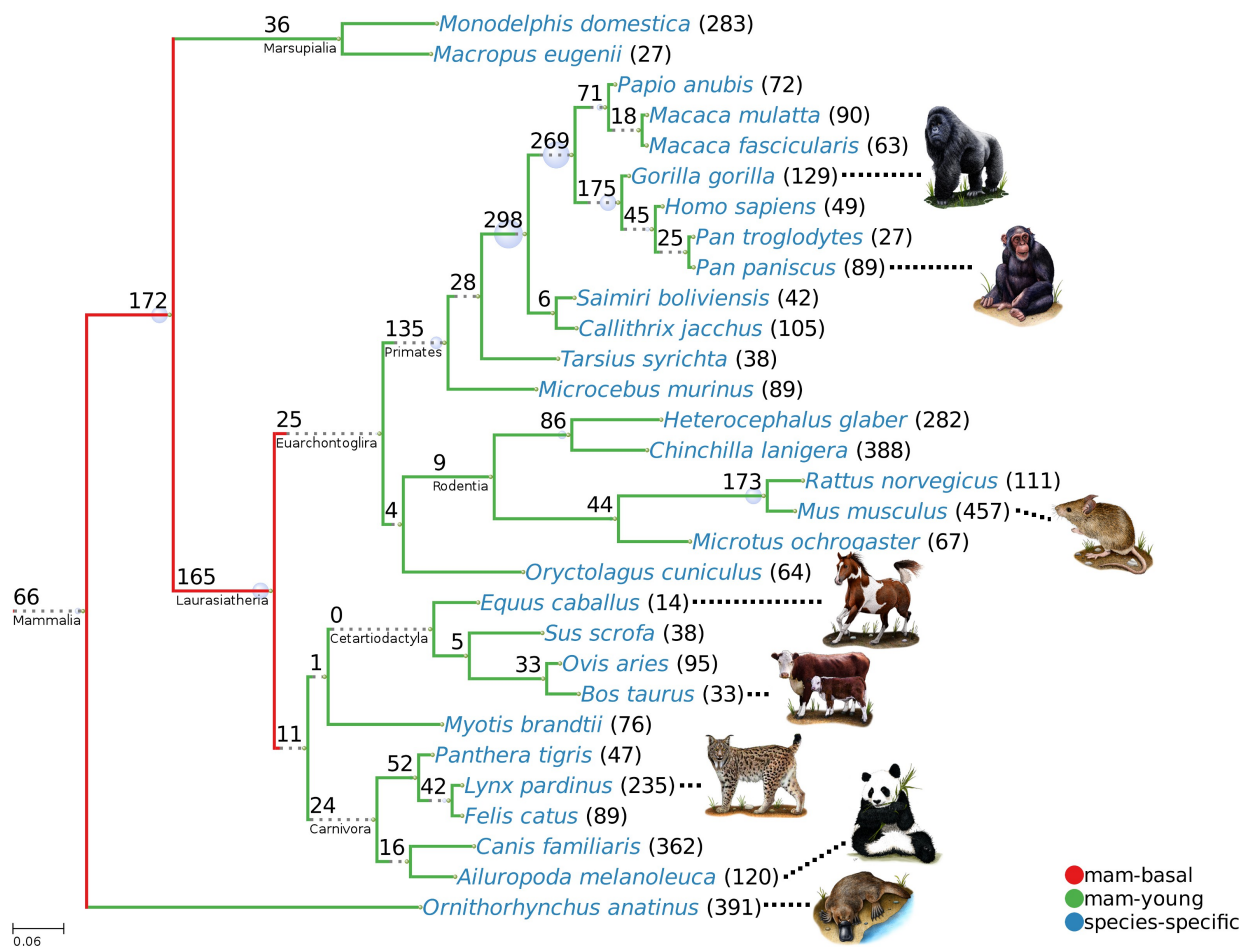

**Figure 1. Mammalian tree and number of mammalian-specific gene families.** The tree depicts the phylogenetic relationships between 30 mammalian species from different major groups. The values in each node indicate the number of families that were mapped to the branch ending in the node. We define three conservation levels: 'mam-basal' (class 2, approximately older than 100 Million years, red), 'mam-young' (class 1, green) and 'species-specific' (class 0, blue). The branch length represents the approximate number of substitutions per site as inferred from previous studies (see Methods). The scale bar on the bottom left corner represents 6 substitutions per 100 nucleotides. Dotted lines have been added to some branches to improve readability.

### Mammalian-specific genes are enriched in testis

We compared the gene expression patterns in different tissues using human data from GTEx (Ardlie et al. 2015) and mouse data from ENCODE (Pervouchine et al. 2015) (Tables S2-S7). We generated two control gene sets: a set of randomly chosen genes that were not mammalian-specific ('random') and a collection of genes with homologues in all 34 non-mammalian species used in step 1 of our method

('ancestral'). We found that mammalian-specific genes were strongly enriched in testis. The number of mammalian-specific genes with highest expression in this organ was 50% in human and 40% in mouse, compared to 20% and 13%, respectively, for 'random' genes (Fisher test p-value  $<10^{-5}$  for both species). The genital fatpad in mouse also showed a significant enrichment of mammalian-specific genes (Fisher test p-value  $<0.01$ ), although this affected a much smaller percentage of genes ( $\sim 5\%$ ).

We estimated the number of genes that were tissue-specific using a previously described metric (Yanai et al. 2005). The majority of mammalian-specific genes were tissue-specific, whereas this was not the case for the control gene sets (Figure 2A and S3A, for mouse and human; Fisher test p-value  $< 10^{-5}$  for both species). The 'mam-basal' (class 2) genes tended to be more tissue-specific than younger gene classes (Fisher test p-value  $< 0.005$  for both human and mouse). Most mammalian-specific genes that were tissue-specific showed highest expression expression in testis (Figure 2B and S3B).

We extracted the gene expression values as FPKMs (Fragments Per Kilobase per Million mapped reads) from GTEx and mouse ENCODE, focusing on the tissue with the highest gene expression. As the three classes of mammalian-specific genes showed a very similar enrichment in testis, their FPKM values could be directly compared. We found that 'mam-basal' genes were, in general, expressed at higher levels than 'mam-young' or 'species-specific' genes (Wilcoxon test p-value  $< 10^{-4}$  for both mouse and human)(Figure 2C and S3C).

An enrichment of mammalian-specific genes in testis was expected given previous observations that nascent transcripts in humans are often expressed in this organ (Ruiz-Orera et al. 2015). However, we expected that the fraction would progressively decrease as we considered older classes. This would fit the 'out of testis' hypothesis, which proposes that new genes would be first expressed in testis, probably due to highly permissive transcription in the germ cells (Soumillon et al. 2013), and would later gain expression in other tissues (Vinckenbosch et al. 2006). However, we did not observe any difference between the groups. This suggests that not only new genes are born in testis but that many lineage-specific genes may have important functions in this organ.

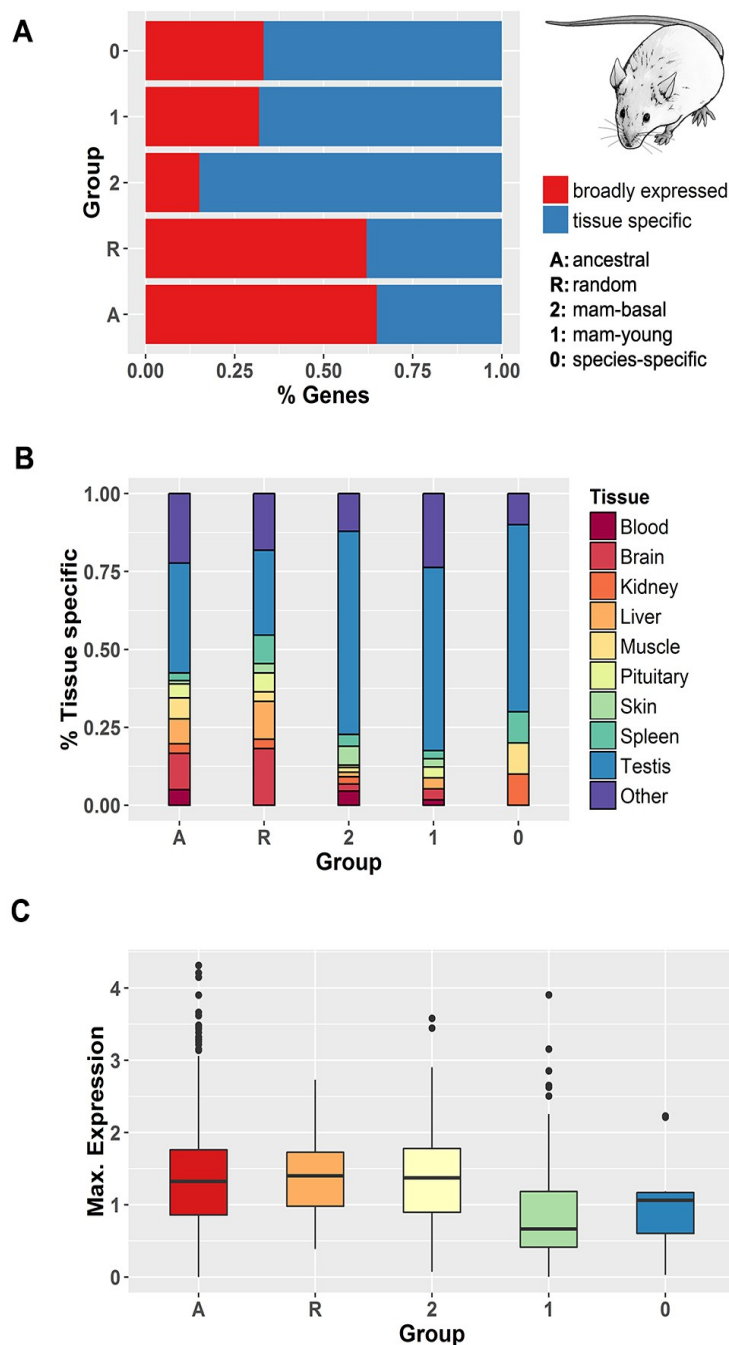

**Figure 2. Gene expression patterns of genes from different conservation levels. A.** Proportion of broadly-expressed and tissue-specific genes in different conservation classes. **B.** Number of genes with maximum expression in a given tissue for different conservation classes. **C.** Box-plot showing the distribution of FPKM gene expression values, at a logarithmic scale, in different conservation classes and for the tissue with the highest expression value. Data in B and C is for tissue-specific genes. All data shown is for mouse genes. See Figure S3 for the same data for human genes.



## Mammalian-specific proteins tend to be short

Different studies have found that proteins encoded by genes with a narrow phylogenetic distribution tend to be shorter than average (Albà and Castresana 2005; Carvunis et al. 2012; Toll-Riera, Radó-Trilla, et al. 2012; Neme and Tautz 2013; Arendsee et al. 2014; Palmieri et al. 2014). We investigated whether this trend was also true in our dataset. We compared mammalian-specific genes from different conservation levels to the 'random' and 'ancestral' gene sets. We confirmed that the mammalian-specific proteins were significantly shorter than the other proteins (Figure 3A, Wilcoxon test p-value <  $10^{-5}$ ). Proteins in the 'mam-basal' were slightly longer than those in the 'mam-young' or 'species-specific' sets (Wilcoxon test p-value < 0.01). When we restricted the analysis to human or mouse proteins we obtained similar results (Figure S4).

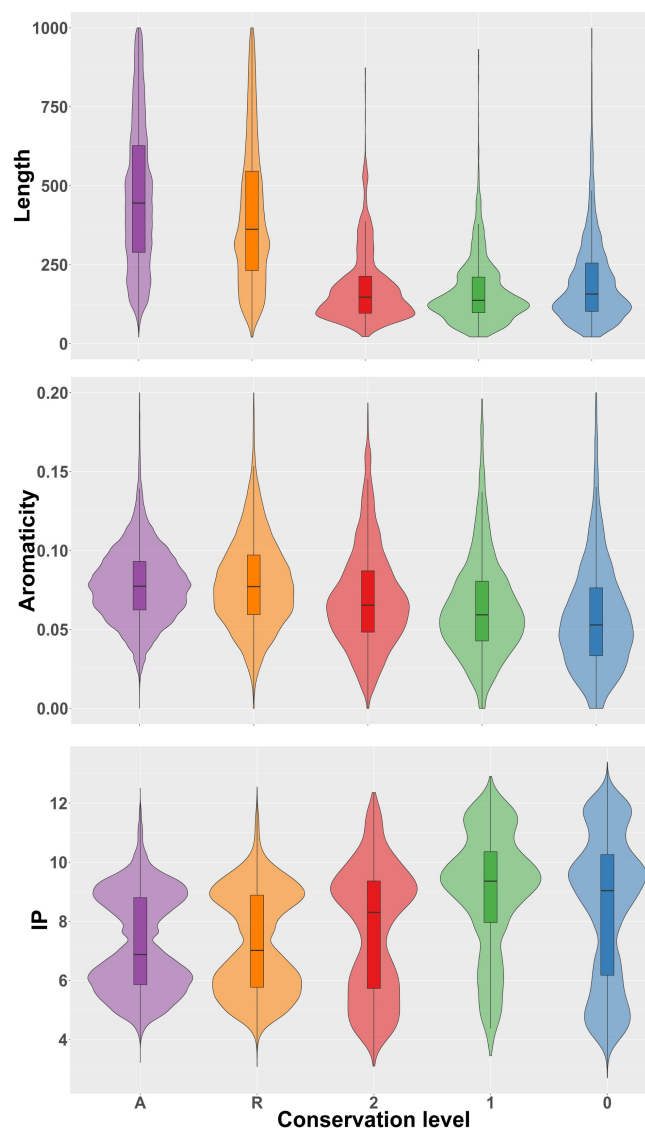

**Figure 3. Sequence properties of mammalian-specific genes. A.** Sequence length in amino acids. **B.** Aromaticity. **C.** Isoelectric point (IP). Protein sequences were extracted from the complete gene families set. We used the following gene groups: A: ancestral; R: random; 2: 'mam-basal'; 1: 'mam-young'; 0: species-specific.

**Proteomics support**

We used the PRIDE peptide database (Vizcaíno et al. 2016) to search for matches to the sets of human and mouse mammalian-specific proteins. We required at least two unique matching peptides. Using negative controls derived from intronic or random sequences we obtain that these conditions were very stringent and corresponded to less than 0.2% false discovery rate. Despite the short size of mammalian-specific proteins, potentially hindering their detection by mass spectrometry (Slavoff et al. 2013), we could find proteomics evidence for a large number of them (Figure 4A, Table S8 and S9 for human and mouse, respectively). For example, the number of 'mam-basal' mouse proteins with proteomics evidence was 88%, and in the classes 'mam-young' and 'species-specific' the percentage was also remarkably high ( $\geq 75\%$ ). In most cases this was supported by more than two PRIDE peptides (Figure 4B and 4C). In humans peptide coverage was lower due to database limitations, for example about 50% of the human proteins in the 'mam-basal' group had peptide hits (compared to 88% in mouse).

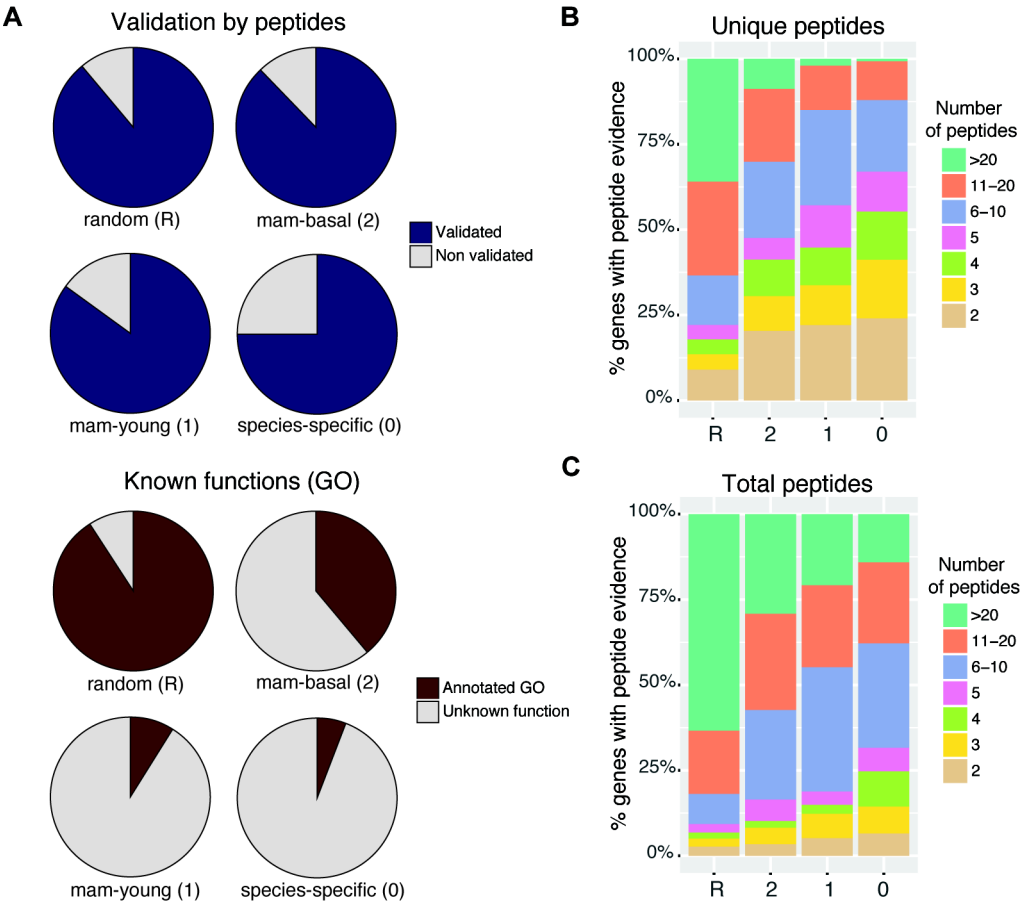

**Figure 4. Proteomics and Gene Ontology information. A.** Proportion of mouse genes with proteomics or Gene Ontology (GO) data for different gene groups. Validated by proteomics were proteins that had at least two different peptides with a perfect match and these peptides did not map to any other protein allowing for up to two mismatches. B. Number of unique peptides for proteomics validated proteins from different groups. C. Number of total peptides for proteomics validated proteins from different groups.

### Biases in aromaticity and isoelectric point

In addition to sequence length, some studies have reported differences in the sequence composition of young proteins with respect to older proteins (Carvunis et al. 2012; Arendsee et al. 2014). Here we inspected the distribution of aromaticity and isoelectric point (IP) values (Figure 3B and 3C, respectively) in the different gene sets. We found that aromaticity values were significantly lower in mammalian-specific proteins than in proteins from the classes 'ancestral' and 'random' (Wilcoxon test  $p$ -value  $< 10^{-5}$ ). This effect could be clearly appreciated at the different conservation levels. These findings were confirmed in the human and mouse protein subsets (Figure S5).

IP values were significantly higher in mammalian-specific proteins than in 'ancestral' and 'random' proteins (Wilcoxon test,  $p$ -value  $< 10^{-5}$ ). Additionally, among mammalian-specific genes, the most recent families ('mam-young' and 'species-specific') had significantly higher IP values than the oldest ones ('mam-basal') (Wilcoxon test,  $p$ -value  $< 10^{-5}$ ). This indicated a depletion of negatively charged amino acids in the youngest proteins. This trend was confirmed in the human and mammalian protein subsets (Figure S6).

### Functions of mammalian-specific genes

We searched for information on gene function using Gene Ontology (GO) (Ashburner et al. 2000). We focused on human and mouse because these species are relatively well-annotated and at the same time sufficiently distant as to contain completely different families in the class 'mam-young'. We found functional data for 38% of the 'mam-basal' families, a relatively low percentage when compared to that for more widely conserved genes ('random', ~90%)(Tables S10 and S11). But the most striking finding was the low percentage of 'mam-young' families with functional data, which was only of about 6% for both human and mouse containing families. This anecdotal level of annotation was consistent across the different 'mam-young' nodes in the phylogeny. Figure 4A shows the percentage of genes annotated with GO terms for the different mouse conservation groups. There is a striking contrast between the low level

of functional annotation and the high level of proteomics support for young mammalian-specific gene families.

We performed a functional enrichment test with DAVID (Huang et al. 2009). Table 2 shows a summary of the main functional groups for human mammalian-specific genes, very similar results were obtained for mouse (Tables S12 and S13). The 'mam-basal' class was significantly enriched in terms related to 'immune response', 'reproductive process' and 'extracellular region' (Fisher exact test, Benjamini-Hochberg multiple test correction  $p$ -value  $< 0.01$ ). The 'mam-young' class was only weakly enriched in the term 'extracellular region' ( $p$ -value = 0.04). The lack of results in this group was expected given the small percentage of genes with known functions. We describe the main overrepresented functional classes below.

### 1. Immune response

Proteins involved in immune response encoded by mammalian-specific genes included several peptides modulating the activity of B or T cells (cytokines) as well as a number of known antimicrobial peptides (AMPs). In the first group there were several interleukins (IL2, IL3, IL13, IL32 and IL33), the tumor necrosis factor superfamily 9 and the IgA-inducing protein (IGIP) (see Table 1). AMPs comprised dermcidin (Schitteck et al. 2001), mucin-7 (Bobek and Situ 2003) and C10orf99 (Yang et al. 2015).

AMPs are part of the innate immune system. They are small proteins that contain specific sequence patches, often enriched in basic amino acids, that directly interfere with the bacteria or fungus cell membrane. We used the software AMPA (Torrent et al. 2012) to evaluate the AMP sequence propensity of mammalian-specific proteins. This software produces a score that is inversely related to the AMP potential of the protein, and which identifies protein stretches with putative antimicrobial activity. First, we confirmed that human proteins with known AMP activity had lower AMPA scores than proteins for which such activity has not been described (Table S14, Wilcoxon test  $p$ -value  $< 10^{-5}$ ). Second, we compared mammalian-specific proteins to a set of proteins of similar size but conserved in other vertebrates (control set, Table S14). We found that the mammalian-specific proteins had significantly lower scores than the control set (Wilcoxon test  $p$ -value = 0.0009). We also discovered that the proteins classified as 'mam-basal' had an excess of proteins with two or more putative AMP sequence stretches (Fisher test  $p$ -value=0.016). One example was mucin-7, which contained a previously described stretch with anti-fungal activity (Bobek and Situ 2003). The program predicted a second putative sequence with

antimicrobial activity that we validated experimentally (Figure S7). Although it is difficult to predict which specific proteins are *bona fide* AMPs based on this data alone, the general enrichment in AMP-like features suggests that a number new proteins may have acquired this activity.

## 2. *Reproduction*

5 Genes with the term reproductive process had a variety of functions related to spermatogenesis or sperm motility. The group included proteins involved in the replacement of histones by protamines in the germ cells, such as transition protein 2. Other proteins had structural roles, such as the sylicins, which are an integral part of the complex cytoskeleton of sperm heads (Hess et al. 1993). Proteins affecting sperm motility included protamine 3 (Grzmil et al. 2008) and the mitochondrion-associated cysteine-rich protein  
10 (SMCP) (Nayernia et al. 2002). Mice in which the gene encoding SMCP has been disrupted exhibited reduced motility of the spermatozoa and decreased capability of the spermatozoa to penetrate oocytes (Nayernia et al. 2002). Here we dated the SMCP gene to the common ancestor of mouse and rat. In general, many of the mammalian-specific genes showed the highest level of expression in testis, suggesting that a substantial fraction of them is likely to have reproduction-related functions.

## 15 3. *Secreted proteins*

A large group of mammalian-specific gene families were annotated as “secreted protein” and/or “extracellular space” (Table 2). This group included many proteins from the immune response system but also proteins secreted in other organs, such as the mammary gland (caseins), skin (dermokine) or the lung (secretoglobins). This highlights the importance of secreted or extracellular molecules in recent  
20 mammalian adaptations.

## **Origin of mammalian-specific proteins**

Mammalian-specific protein-coding genes may have originated from the recycling of already existing coding sequences or completely *de novo* from previously non-coding genomic regions (Toll-Riera et al. 2009; Neme and Tautz 2013). In the context of new genes for which ancestors cannot be traced back, as  
25 described in this paper, the first process often involves complex sequence rearrangements and the cooption of genomic sequences into new coding exons. Comparative genomics studies have shown that the caseins, which transport calcium in milk, probably originated from genes encoding teeth proteins

during the early evolution of mammals, following a series of gene duplications, sequence rearrangements and rapid sequence divergence events (Kawasaki et al. 2011). Another example is the mammalian-specific Late Cornified Envelope (LCE) group of proteins. The LCEs are part of a gene cluster shared by mammals, birds and reptiles, known as the epidermal differentiation complex (EDC). In this cluster, multiple episodes of sequence duplication and divergence have resulted in the extraordinary functional diversification of epidermal proteins in mammals (Strasser et al. 2014).

In other cases the genes may have originated *de novo* from a previously non-coding sequence of the genome (Knowles and McLysaght 2009; Toll-Riera et al. 2009; Wu et al. 2011; Murphy and McLysaght 2012; Samusik et al. 2013; Chen et al. 2015; Ruiz-Orera et al. 2015; Guerzoni and McLysaght 2016).

The definition of a *de novo* gene usually includes the requirement that the syntenic genomic regions from closely related species lack a coding sequence of a similar length. This means that *de novo* genes that have originated a long time ago will be very difficult to identify, as genome synteny will no longer be detectable. Our dataset contained 15 human and 13 mouse *de novo* protein-coding genes identified in previous studies (Tables S15 and S16, respectively; Table 1 for selected examples). One example was the human minor histocompatibility protein HB-1, which modulates T-cell responses and previously defined as primate-specific (Toll-Riera et al. 2009). As expected, these genes corresponded to recent nodes, containing one or a few closely related species.

## Discussion

The sequencing of complete genomes has resulted in a more accurate view of the number of genes in each species and how these genes relate to genes in other species. A puzzling discovery has been that a sizable fraction of genes does not have homologues in other species (Toll-Riera et al. 2009; Donoghue et al. 2011; Tautz and Domazet-Lošo 2011; Macarena Toll-Riera et al. 2011; Carvunis et al. 2012; Wissler et al. 2013). A well-known mechanism for the formation of new genes is gene duplication (Ohno 1970). However, the sequence divergence of gene duplicates is in general limited by the structural and functional constraints inherited from the parental gene (Ohno and Epplen 1983)(Pegueroles et al. 2013)(Pich I Roselló and Kondrashov 2014). For this reason sequence novelty in orphan genes is often linked to sequences that were not previously coding but that have been coopted for a coding function (Levine et al. 2006; Knowles and McLysaght 2009; Xie et al. 2012; Ruiz-Orera et al. 2014). These new genes are likely to drive important species- and lineage-specific adaptations (Khalturin et al. 2009; Johnson and Tsutsui 2011) but we still know very little about their specific functions.

In order to advance our knowledge in this field we have performed the first integrated analysis of mammalian-specific gene families. We have computed extensive sequence similarity searches using both annotated proteomes and RNA-Seq-derived data. This has resulted in the construction of thousands of gene families, each assigned to one of the 29 internal nodes or 30 terminal branches of the tree. This is different from the classical “phylostratigraphy” approach, which is based on the homologues found for a single species (Albà and Castresana 2005; Domazet-Lošo et al. 2007). The integration of data from multiple species is expected to result in a more robust classification of the node of origin of each gene. With this approach, the gene families that are specific to each group of organisms can be directly retrieved and studied.

In our study we took a conservative approach and considered both protein-based and transcript-based homologies. The origin of a gene was largely based on transcription data, as it is currently not possible to assess translation except for model species. There were 439 gene families that were classified as 'mam-basal' and which were in general represented by a large number of species (>15 species in 78% of cases). Although functional annotations were quite incomplete even for these genes, their analysis provided a very clear picture of the important role of new genes in mediating mammalian adaptations.

In mammals, the skin needs to be flexible and thin enough to allow muscles to produce an elastic deformation. The outermost layer of the skin, known as *stratum corneum*, is particularly flexible in this group when compared to the stiff skin of reptiles (Alibardi 2003). Several mammalian-specific genes were involved in the formation of skin structures, such as proteins from the Late Cornified Envelope (LCE) family, Dermokine, Keratinocyte Differentiation-Associated Protein, and Corneodesmosin (CDSN). For example CDSN participates in the specialized junctions known as corneodesmosomes, which bridge together corneocytes in the lower part of the *stratum corneum* (Jonca et al. 2011). Additionally, we found a gene associated with psoriasis (PSOR-1), localized in the same genomic region than CDSN. Another important adaptation in mammals is the production of milk; in most mammals, the most abundant milk proteins are caseins, which form micelles in which they transport calcium. Our method identified several caseins (alpha S1, beta, kappa), which are part of a larger family of secretory calcium-binding phosphoproteins (SCPP) that may have diverged extensively in a common ancestor of current day mammals (Kawasaki et al. 2011).

Mammalian-specific genes are often expressed in testis and are significantly enriched in testis-related

functional terms such as 'spermatogenesis' and 'sperm motility'. The over-representation of new genes in this organ has been noted before, both in the case of duplicated genes (Kaessmann et al. 2009) and *de novo* evolved genes (Levine et al. 2006; Ruiz-Orera et al. 2015). For genes conserved across many mammalian groups ('mam-basal'), this enrichment probably reflects the importance of sexual selection in driving changes in the reproductive organs, both at the anatomical and molecular levels (Gage et al. 2004; Kleene 2005). As a result of sexual selection, new genes that increase sperm competitiveness will rapidly reach fixation in the population, and subsequently be preserved by purifying selection.

It is well-documented that germ cells express a large variety of transcripts, including conserved coding genes, *de novo* genes and transcripts derived from intergenic regions (Soumillon et al. 2013; Ruiz-Orera et al. 2015). This permissive chromatin environment is likely to favor the birth of new genes (Begun et al. 2006; Kaessmann 2010). This is generally consistent with our observations that many young mammalian genes show highest expression in this organ. However, as many of the youngest genes may disappear over time (Palmieri et al. 2014), one may expect that the testis enrichment will tend to decrease for older gene sets. In contrast, we found a similar enrichment for genes present in many mammalian species ('mam-basal') and for younger genes ('mam-young' and 'species-specific'). Intriguingly, the 'mam-basal' genes were expressed at much higher levels than younger genes. This probably reflects the presence of many 'mam-basal' genes with important germ cell functions. It also supports the idea that the expression level of genes may tend to increase over time.

Another large group of mammalian-specific genes encoded proteins involved in the immune response. One example was the IgA-inducing protein (IGIP), a short secreted protein which is composed of only 52 residues. This protein is produced in the dendritic cells and stimulates the production of immunoglobulin A in B cells (Endsley et al. 2009). Although its sequence is highly conserved across mammals, no homologues have been found in other vertebrates. Our set of mammalian-specific genes also included several previously described antimicrobial peptides (AMPs). The antimicrobial active regions in AMPs are often enriched in certain residues, including arginines and cysteines (Yeaman and Yount 2007). This can be used to predict the propensity of a protein to be an AMP (Torrent et al. 2012). We observed higher AMP propensities in mammalian-specific genes than in non mammalian-specific genes, suggesting that there may be additional mammalian-specific AMPs that have not yet been characterized.

The mechanism of origin of the majority of 'mam-basal' gene families is unknown. There are however a number of cases in which the genes are part of multi-gene families and have probably originated, at least



partially, from the recycling of duplicated coding sequences (Kawasaki et al. 2011; Grayson and Civetta 2012; Strasser et al. 2014). In general, we expect the divergence of a new gene to be very fast at first; due to joint effects of relaxation of selection and positive selection, and become slower at latter stages, when the gene has fully acquired the new function (Pegueroles et al. 2013). In some cases these changes may be very drastic and the similarity to the ancient parental gene be lost (Domazet-Loso and Tautz 2003; Toll-Riera et al. 2009).

However, due to the high sensitivity of BLASTP in closely related species such as mammals (Albà and Castresana 2007), and the large number of genomes employed, many of the youngest genes may have originated completely *de novo* during mammalian evolution. Our set of 'mam-young' genes contained several *de novo* genes previously reported in the literature; the vast majority of these genes had no known functions, but they were in general supported by proteomics data, including nearly a hundred human- or primate-specific genes. This probably indicates that many of them are functional but have been understudied due to poor species conservation, a lack of a mouse model system, and restricted tissue expression. They may perform functions related to those of older mammalian-specific genes; enrichment in testis is consistent with the idea that at least some of them have retained because they confer a reproductive advantage.

Species-specific genes were surprisingly abundant in comparison to the other classes. The number was variable depending on the species, which is expected given that the genomes have been annotated by different consortia. For example, whereas for most primate genomes the annotations are primarily based on human, in other species, such as the lynx, extensive RNA-Seq data has also been employed. Additionally, the genetics distances between species differ considerably. For instance the distance between mouse and rat, is of about 0.2 substitutions/site, which is comparable to the distance separating the most distant primate species. It is not surprising that mouse had a very large number of species-specific genes; we validated 291 of these genes by proteomics analysis. An excess of species-specific genes in phylostratigraphy-based studies has been previously observed (Neme and Tautz 2013). These observations are consistent with a high rate of *de novo* gene emergence accompanied by frequent gene loss in the first stages of the evolutionary history of a gene (Neme and Tautz 2014; Palmieri et al. 2014). We also have to consider that some of the very young genes may not be functional even if translated (Ruiz-Orera et al. 2016).

An important question is whether genes from different conservation levels (or gene ages) form a

continuum, meaning that the observations are not independent but reflect different phases of the same process (Albà and Castresana 2005; Carvunis et al. 2012). Our results show that this is likely to be the case, as there are many similarities between the genes of the different mammalian-specific classes. In the first place, independently of the specific age of the gene, the encoded proteins tend to be much shorter than average. It is easy to understand why new coding sequences, specially those originated *de novo*, will tend to be shorter than proteins that have evolved for a long time. In the first case the open reading frame (ORF) is derived from a previously non-coding sequence, and it will be difficult to obtain long ORFs by chance. In contrast, proteins which have evolved over a long time usually have several domains, which may have been gained in stages (Buljan et al. 2010; Toll-Riera and Albà 2013; Andreatta et al. 2015).

Mammalian-specific proteins are depleted of aromatic and negatively charged residues when compared to the rest of proteins. The trend is more extreme in the youngest proteins, supporting the idea of a continuum. One possibility is that these residues are more often associated with deleterious effects, at least in the context of short proteins with a large solvent contact surface. Interestingly, young proteins in plants also tend to have higher isoelectric point values than older proteins (Arendsee et al. 2014). To our knowledge there has been no studies addressing the relationship between aromaticity and gene age *per se*.

Contrary to early predictions (Casari et al. 1996), the sequencing of new genomes has not solved the mystery of orphan genes; in fact, we now have an ever larger number of orphans than we did before. The cell expresses many transcripts with low coding potential, or long non-coding RNAs, which are species- or lineage-specific, and which can potentially be translated (Ruiz-Orera et al. 2014). Whereas there is ample evidence for continuous new gene emergence, it is unclear which functions these genes contribute. On the basis of over 400 mammalian-specific genes that are relatively well-conserved and have functional annotations we have found that many new genes encode secreted proteins and their formation may have been advantageous in the response against pathogens or mating. The collection of gene families obtained here will help accelerate future studies on the evolutionary dynamics and functions of novel genes.

## MATERIALS AND METHODS

### Sequence sources

We initially identified 68 mammalian species that had fully sequenced genomes and which showed a relatively sparse distribution in the mammalian tree. The proteomes and cDNA sequences were downloaded from Ensembl v.75 (Flicek et al. 2014), the National Center for Biotechnology Institute (NCBI Genbank version available on March 2014)(Benson et al. 2015) and the *Lynx pardinus* Genome Sequencing Consortium (Abascal et al. 2016). The tree topology, and the approximate number of substitutions per site in each branch, were obtained from previous studies (Meredith et al. 2011; Toll-Riera et al. 2011; O'Leary et al. 2013). We downloaded RNA sequencing (RNA-Seq) data for 30 different species using the public resource Gene Expression Omnibus (GEO) (Barrett et al. 2013). The RNA-Seq samples were from different body tissues depending on the species. The total number of RNA-Seq samples was 434, with a median of 10 samples per species.

### Identification of mammalian-specific genes

We run BLASTP sequence similarity searches for each of the mammalian proteomes against a set of 34 non-mammalian proteomes (Table S1). All BLASTP searches were run with version 2.2.28+ using an e-value threshold of  $10^{-4}$  and the filter for low complexity regions (LCRs) activated (seg = 'yes') (Altschul et al. 1997). Consequently, we did not consider proteins that were extensively covered by LCRs (with less than 20 contiguous amino acids devoid of LCRs as measured by SEG with default parameters (Wootton and Federhen 1996)). We also discarded genes encoding a protein that had significant sequence similarity to non-mammalian species, as well as genes that had paralogues with homologues in non-mammalian species, as previously described (Toll-Riera et al. 2009).

We generated two control sets of non mammalian-specific genes. The first set, which we named 'ancestral' (A) contained proteins that had homologues in all the 34 non-mammalian species mentioned above. This set of genes is well-conserved across eukaryotes, having originated in a common ancestor. The second set, named 'random' (R), contained 1,000 proteins (for each species) that were not in the mammalian-specific group.

### Building gene families based on gene annotations

We built a mammalian tree for the species with complete genomes using previous published data (Meredith et al. 2011; O'Leary et al. 2013). The next step was to develop a pipeline to construct gene

families and to assign them to a node in the tree. We wanted the gene families to be as large as possible and include both orthologues and paralogues. The node represented the point from which no further ancestors could be traced back.

We first ran BLASTP searches for every set of mammalian-specific genes in each species against the mammalian-specific genes in the other species (e-value<10<sup>-4</sup>). This resulted in a node of origin for each individual gene and a list of homologous proteins in the same and other species. Next we collated the information for all the homologous proteins, progressively expanding the gene families until no more members could be added. The group then was assigned to the oldest possible node considering the species present in the gene family.

## Transcript reconstructions from RNA-Seq data

The RNA-Seq sequencing reads of each sample underwent quality filtering using ConDeTri (v.2.2) (Smeds and Künstner 2011) with the following settings (-hq=30 -lq=10). Adaptors were trimmed from filtered reads if at least 5 nucleotides of the adaptor sequence matched the end of each read. In all paired-end experiments, reads below 50 nucleotides or with a single pair were not considered. We aligned the reads to the corresponding reference species genome using Tophat (v. 2.0.8) (Kim et al. 2013) with parameters -N 3, -a 5 and -m 1, and including the corresponding parameters for paired-end and stranded reads if necessary. We performed gene and transcript assembly with Cufflinks (v 2.2.0) (Trapnell et al. 2010) for each individual tissue. We only considered assembled transcripts that met the following requirements: a) the transcript was covered by at least 4 reads. b) transcript abundance was >1% of the abundance of the most highly expressed gene isoform. c) <20% of reads were mapped to multiple locations in the genome. d) The reconstructed transcripts were at least 300 nucleotides long. Subsequently, we used Cuffmerge to build a single set of assembled transcripts for each species. We use Cuffcompare to compare the coordinates of our set of assembled transcripts to gene annotation files from Ensembl (gtf format, v.75) or NCBI (gff format, December 2014), to identify annotated transcripts and, to generate a set of novel, non-annotated, transcripts.

## Refinement of the age of the families using transcriptomics data

We performed TBLASTN (e-value < 10<sup>-4</sup>) searches of the proteins in each gene family against the set of novel transcripts assembled from RNA-Seq samples. If we found any homologous sequence in a species

that was more distant to the members of the family than the originally defined node we reassigned the family accordingly, to an earlier node. This was based on conservative criteria, the presence of an homologous expressed sequence, even if not annotated as a gene, was considered as evidence that the gene had originated at an earlier node connecting all homologous transcripts.

5 In order to minimize the biases due to the different availability of RNA-Seq data in different parts of the tree we decided to focus only on the 30 species with RNA-Seq data for all analyses. Besides, we only considered families with sequence representatives in at least half of the species derived from the node to which the family had been assigned. The use of transcriptomics data filled many gaps in the tree and resulted in a deepening of the node of origin in some cases. The use of RNA-Seq data allowed us to  
10 expand the range of species for 1,126 of the gene families initially defined as species-specific (~22%) and to increase the number of species per family in 617 multi-species families (68%). The procedure resulted in 2,013 multi-species gene families and 3,972 species-specific gene families (mostly singletons).

## Gene expression data

15 We retrieved gene expression data from GTEx (Ardlie et al. 2015) and mouse ENCODE (Stamatoyannopoulos et al. 2012) tissue expression panels. We only analyzed genes which were expressed in at least one tissue sample. We computed the FPKM (Fragments per Kilobase Per Million mapped reads) median expression for each gene and tissue available in GTEx (release 2014, Ensembl v.74). For Mouse ENCODE, which was based on Ensembl v.65 (mm9), we computed the FPKM mean for  
20 each gene and for tissues with 2 replicas we only used the data if reproducibility indexes were lower than 0.1. We identified the tissue with the highest expression value and calculated the tissue preferential expression index as previously described (Yanai et al. 2005; Ruiz-Orera et al. 2015). Genes for which this index was 0.85 or larger were classified as tissue-specific.

## Sequence features and proteomics data

25 The analysis of the sequences from different sets was performed using Python scripts. We employed Biopython embedded functions to calculate the isoelectric point (IP) and aromaticity. We used the proteomics database PRIDE (Vizcaíno et al. 2016) to search for peptide matches in the proteins encoded by various gene sets. For a protein to have proteomics evidence we required that it had at least two

distinct peptide perfect matches and that the peptides did not map to any other protein allowing for up to two mismatches. We estimated the false discovery rate was below 0.2% using two different negative control sets. The first one consisted in building fake sets of human and mouse protein sequences, by preserving the amino acid composition and protein length of the 'random' human and mouse datasets, and subsequently searching for peptide matches. After repeating the procedure 10 times, we obtained that 0.18 % of the human proteins, and 0.69% of the mouse proteins had 1 or more peptide hits, but none of them had 2 or more peptide hits. The second control used translated intronic sequences of the same length as the coding sequences in the 'random' human and mouse datasets. After repeating the procedure 10 times, we obtained that 0.36 % of the human proteins, and 1.68 % of the mouse proteins had 1 or more peptide hits, but only 0% and 0.19% of the human and mouse proteins, respectively, had 2 or more peptide hits.

## Functional analysis

We downloaded Gene Ontology (GO) terms from Ensembl v.75 for all human and mouse genes (Tables S11 and S12, respectively). In order to estimate the number of gene with known functions in each conservation class we counted how many genes were associated with at least one GO term. We did not consider the terms 'biological process', 'nucleus', 'cellular\_component', 'molecular\_function', 'cytoplasm', 'plasma membrane', 'extracellular space', 'protein binding', 'extracellular region', or 'integral to membrane' as they were very general and did not imply knowledge of the function of the protein.

We used DAVID (Huang et al. 2009) to assess enrichment of particular functions or subcellular locations in mammalian-specific genes from human and mouse (Tables S13 and S14, respectively).

## Prediction of antimicrobial activity

We wanted to test if mammalian-specific genes were enriched in AMP-like features. This was motivated by the enrichment of immune response proteins among mammalian-specific genes (Table 2), including three known AMPs (dermcidin, mucin 7, C10orf99 protein) and the skew towards high isoelectric point values observed in these proteins (Figure 3). We measured the antimicrobial activity potential of all human proteins using the program AMPA (Torrent et al. 2012). In the majority of proteins from a set of 59 genes encoding known AMPs, which we gathered from the literature, AMPA was able to predict stretches with AMP activity (Table S15, AMP status 'known'). We then used this program to calculate

scores and number of putative AMP stretches in mammalian-specific proteins (Table S15, type 'mammalian-specific') as well as in a large set of size-matched non mammalian-specific proteins (Table S15, type 'conserved').

The peptides for testing the antimicrobial activity were prepared by Fmoc solid phase synthesis methods, purified by HPLC and characterized by mass spectrometry, as previously described (Falcao et al. 2015). We assayed the activity of mucin-7 peptides on reference strains of *E. coli* (ATCC 25922), *P. aeruginosa* (ATCC 27853), *E. faecalis* (ATCC 29212), and *S. aureus* (ATCC 29213) at the Microbiology Service of Hospital Clínic (Universitat de Barcelona). Minimal inhibitory concentration (MIC) assays were performed by the microdilution method in Mueller–Hinton broth according to Clinical and Laboratory Standards Institute (CLSI) guidelines. As a positive control the Cecropin A-Melittin peptide CA(1-8)M(1-18) was employed (Saugar et al. 2002). This peptide exhibited CMI values ranging from 0.5 to 64 in the four bacteria strains tested.

## Statistical Data Analyses

We used Python 2.7 to parse the data from different programs and files, cluster the genes into gene families, and calculate sequence-based statistics. The ete2 package was used to perform analyses using the phylogenetic tree structure (Huerta-Cepas et al. 2010). We generated plots and performed statistical tests with R (R Development Core Team 2013).

## DATA AVAILABILITY

Supplementary tables and figures can be found in Supplementary file 1 and 2, respectively. The list of mammalian-specific gene families with information of species and proteins identifier is available at <http://dx.doi.org/10.6084/m9.figshare.4239404>. Protein sequences for the gene families are available from <http://dx.doi.org/10.6084/m9.figshare.4239440>. Information on the RNA-Seq datasets employed for transcript assembly is available from <http://dx.doi.org/110.6084/m9.figshare.4239431>. Transcripts assemblies generated from the RNA-Seq data and used in node of origin estimation are available from <http://dx.doi.org/10.6084/m9.figshare.4239449>.

## ACKNOWLEDGEMENTS

We acknowledge Sarah Djebali for providing us with data on mouse Encode, Roger Hall and Sara Díez for the beautiful drawings in Figures 1 (RH) and 2 (SD), Javier Valle for help with peptide synthesis and William Blevins for comments. The work was funded by grants BFU2012-36820 and BFU2015-65235-P from Ministerio de Economía e Innovación (Spanish Government) and co-funded by FEDER. We also  
5 received funding from Agència de Gestió d'Ajuts Universitaris I de Recerca Generalitat de Catalunya (AGAUR), grant number 2014SGR1121.



## TABLES

| Gene Name     | Description                                          | Tree Node | Features                                                                         | References                                      |
|---------------|------------------------------------------------------|-----------|----------------------------------------------------------------------------------|-------------------------------------------------|
| SCGB          | secretoglobin                                        | Mammalia  | Gene family, modulation of inflammation                                          | (Jackson et al. 2011)                           |
| PRM3          | protamine 3                                          | Theria    | Affects sperm motility                                                           | (Grzmil et al. 2008)                            |
| CSN1S1        | casein alpha s1                                      | Eutheria  | Ca-sensitive milk protein, related to vertebrate calcium-binding protein SPARCL1 | (Kawasaki et al. 2011)                          |
| LCE6A         | late cornified envelope 6A                           | Eutheria  | Formation of the skin, part of the epidermal differentiation complex             | (Strasser et al. 2014)                          |
| IL2           | interleukin 2                                        | Eutheria  | Cytokine, rapid sequence divergence                                              | (Bird et al. 2005)                              |
| MUC7          | mucin 7                                              | Eutheria  | Antimicrobial peptide, secreted in saliva                                        | (Bobek and Situ 2003; Xu et al. 2016)           |
| NNAT          | neuronatin                                           | Eutheria  | Neural development                                                               | (Evans et al. 2005)                             |
| IGIP          | IgA-inducing protein                                 | Eutheria  | Activates the production of immunoglobulin A by B cells.                         | (Endsley et al. 2009)                           |
| SMCP          | sperm mitochondrial-associated cysteine-rich protein | Eutheria  | Involved in sperm motility                                                       | (Nayernia et al. 2002)                          |
| CLLU1         | chronic lymphocytic leukemia up-regulated 1          | Primates  | Over-expressed in leukemia, <i>de novo</i> origin                                | (Knowles and McLysaght 2009)                    |
| HMHB1         | histocompatibility (minor) HB-1                      | Primates  | Precursor of the histocompatibility antigen HB-1, <i>de novo</i> origin          | (Toll-Riera et al. 2009)                        |
| DCD           | dermcidin                                            | Node 16   | Antimicrobial peptide, secreted in the skin                                      | (Schitteck et al. 2001; Toll-Riera et al. 2009) |
| MYEOV         | myeloma over-expressed                               | Node 16   | Over-expressed in myeloma, <i>de novo</i> origin                                 | (Chen et al. 2015)                              |
| RP11-429E11.3 | uncharacterized protein                              | Node 26   | <i>De novo</i> origin                                                            | (Guerzoni and McLysaght 2016)                   |
| RP11-45H22.3  | uncharacterized protein                              | Node 28   | <i>De novo</i> origin                                                            | (Ruiz-Orera et al. 2015)                        |

**Table 1. Examples of mammalian-specific genes families.** Node 1: Mammalia; Node 2: Theria; Node 4: Eutheria; Node 7: Primates; Node 16: Haplorhini; Node 26: great apes; Node 28: human and chimpanzee.

| Enriched function   | Representative terms                                      | N genes | Corrected p-value |
|---------------------|-----------------------------------------------------------|---------|-------------------|
| 1. Immune response  | 1.1 immune response (GO)                                  | 14      | 2.2E-3            |
|                     | 1.2 cytokine activity (GO)                                | 13      | 1.6E-10           |
|                     | 1.3 Jak-STAT signaling pathway (KEGG)                     | 6       | 5.5E-4            |
| 2. Reproduction     | 2.1 reproductive process in a multicellular organism (GO) | 12      | 1.3E-3            |
|                     | 2.2 spermatogenesis (GO)                                  | 10      | 9.2E-4            |
| 3. Secreted protein | 3.1 extracellular region (GO)                             | 64      | 1.8E-15           |
|                     | 3.2 secreted (Uniprot)                                    | 59      | 2.8E-14           |
|                     | 3.3 signal peptide (Uniprot)                              | 60      | 7.0E-10           |

**Table 2. Main functions of mammalian-specific genes.** The results shown are for human genes classified as 'mam-basal' (class 2).

# REFERENCES

- Abascal F, Corvelo A, Cruz F, et al. 2016. Extreme genomic erosion after recurrent demographic bottlenecks in the highly endangered Iberian lynx. *Genome Biol.* 17:251.
- Aguilera F, McDougall C, Degnan BM. 2017. Co-option and de novo gene evolution underlie molluscan shell diversity. *Mol. Biol. Evol.*:msw294.
- Albà MM, Castresana J. 2005. Inverse relationship between evolutionary rate and age of mammalian genes. *Mol. Biol. Evol.* 22:598–606.
- Albà MM, Castresana J. 2007. On homology searches by protein Blast and the characterization of the age of genes. *BMC Evol. Biol.* 7:53.
- Alibardi L. 2003. Adaptation to the land: The skin of reptiles in comparison to that of amphibians and endotherm amniotes. *J. Exp. Zool. B. Mol. Dev. Evol.* 298:12–41.
- Altschul SF, Madden TL, Schäffer AA, Zhang J, Zhang Z, Miller W, Lipman DJ. 1997. Gapped BLAST and PSI-BLAST: a new generation of protein database search programs. *Nucleic Acids Res.* 25:3389–3402.
- Andreatta ME, Levine JA, Foy SG, Guzman LD, Kosinski LJ, Cordes MHJ, Masel J. 2015. The recent de novo origin of protein C-termini. *Genome Biol. Evol.* 7:1686–1701.
- Ardlie KG, Deluca DS, Segre A V., et al. 2015. The Genotype-Tissue Expression (GTEx) pilot analysis: Multitissue gene regulation in humans. *Science* (80-. ). 348:648–660.
- Arendsee ZW, Li L, Wurtele ES. 2014. Coming of age: orphan genes in plants. *Trends Plant Sci.* 19:698–708.
- Ashburner M, Ball CA, Blake JA, et al. 2000. Gene ontology: tool for the unification of biology. The Gene Ontology Consortium. *Nat. Genet.* 25:25–29.
- Barrett T, Wilhite SE, Ledoux P, et al. 2013. NCBI GEO: archive for functional genomics data sets--update. *Nucleic Acids Res.* 41:D991–D995.
- Begun DJ, Lindfors HA, Kern AD, Jones CD. 2006. Evidence for de Novo Evolution of Testis-Expressed Genes in the *Drosophila yakuba/Drosophila erecta* Clade. *Genetics* 176:1131–1137.
- Benson DA, Clark K, Karsch-Mizrachi I, Lipman DJ, Ostell J, Sayers EW. 2015. GenBank. *Nucleic Acids Res.* 43:D30–D35.
- Bird S, Zou J, Kono T, Sakai M, Dijkstra JM, Secombes C. 2005. Characterisation and expression analysis of interleukin 2 (IL-2) and IL-21 homologues in the Japanese pufferfish, *Fugu rubripes*, following their discovery by synteny. *Immunogenetics* 56:909–923.
- Bobek LA, Situ H. 2003. MUC7 20-Mer: investigation of antimicrobial activity, secondary structure, and possible mechanism of antifungal action. *Antimicrob. Agents Chemother.* 47:643–652.
- Buljan M, Frankish A, Bateman A. 2010. Quantifying the mechanisms of domain gain in animal proteins. *Genome Biol.* 11:R74.
- Cai J, Zhao R, Jiang H, Wang W. 2008. De novo origination of a new protein-coding gene in *Saccharomyces cerevisiae*. *Genetics* 179:487–496.
- Carvunis A-R, Rolland T, Wapinski I, et al. 2012. Proto-genes and de novo gene birth. *Nature* 487:370–374.
- Casari G, De Daruvar A, Sander C, Schneider R. 1996. Bioinformatics and the discovery of gene function. *Trends Genet.* 12:244–245.
- Chen J-Y, Shen QS, Zhou W-Z, et al. 2015. Emergence, Retention and Selection: A Trilogy of Origination for Functional De Novo Proteins from Ancestral LncRNAs in Primates. *PLoS Genet.* 11:e1005391.

- Domazet-Lošo T, Brajković J, Tautz D. 2007. A phylostratigraphy approach to uncover the genomic history of major adaptations in metazoan lineages. *Trends Genet.* 23:533–539.
- Domazet-Lošo T, Tautz D. 2003. An evolutionary analysis of orphan genes in *Drosophila*. *Genome Res.* 13:2213–2219.
- 5 Donoghue MT, Keshavaiah C, Swamidatta SH, Spillane C. 2011. Evolutionary origins of Brassicaceae specific genes in *Arabidopsis thaliana*. *BMC Evol. Biol.* 11:47.
- Endsley MA, Njongmeta LM, Shell E, Ryan MW, Indrikovs AJ, Ulualp S, Goldblum RM, Mwangi W, Estes DM. 2009. Human IgA-Inducing Protein from Dendritic Cells Induces IgA Production by Naive IgD+ B Cells. *J. Immunol.* 182:1854–1859.
- 10 Evans HK, Weidman JR, Cowley DO, Jirtle RL. 2005. Comparative phylogenetic analysis of *blcap/nnat* reveals eutherian-specific imprinted gene. *Mol. Biol. Evol.* 22:1740–1748.
- Falcao CB, Pérez-Peinado C, de la Torre BG, Mayol X, Zamora-Carreras H, Jiménez MÁ, Rádis-Baptista G, Andreu D. 2015. Structural Dissection of Crotalicidin, a Rattlesnake Venom Cathelicidin, Retrieves a Fragment with Antimicrobial and Antitumor Activity. *J. Med. Chem.* 58:8553–8563.
- 15 Flicek P, Amode MR, Barrell D, et al. 2014. Ensembl 2014. *Nucleic Acids Res.* 42:D749–D755.
- Gage MJG, Macfarlane CP, Yeates S, Ward RG, Searle JB, Parker GA. 2004. Spermatozoal traits and sperm competition in Atlantic salmon: relative sperm velocity is the primary determinant of fertilization success. *Curr. Biol.* 14:44–47.
- Genome 10K Community of Scientists. 2009. Genome 10K: a proposal to obtain whole-genome sequence for 10,000 vertebrate species. *J. Hered.* 100:659–674.
- 20 Grayson P, Civetta A. 2012. Positive Selection and the Evolution of *izumo* Genes in Mammals. *Int. J. Evol. Biol.* 2012:958164.
- Grzmil P, Boinska D, Kleene KC, et al. 2008. *Prm3*, the Fourth Gene in the Mouse Protamine Gene Cluster, Encodes a Conserved Acidic Protein That Affects Sperm Motility. *Biol. Reprod.* 78:958–967.
- 25 Guerzoni D, McLysaght A. 2016. De Novo Genes Arise at a Slow but Steady Rate along the Primate Lineage and Have Been Subject to Incomplete Lineage Sorting. *Genome Biol. Evol.* 8:1222–1232.
- Heinen TJAJ, Staubach F, Häming D, Tautz D. 2009. Emergence of a new gene from an intergenic region. *Curr. Biol.* 19:1527–1531.
- 30 Hess H, Heid H, Franke WW. 1993. Molecular characterization of mammalian cyclin, a basic protein of the sperm head cytoskeleton. *J. Cell Biol.* 122:1043–1052.
- Huang DW, Sherman BT, Lempicki RA. 2009. Systematic and integrative analysis of large gene lists using DAVID bioinformatics resources. *Nat. Protoc.* 4:44–57.
- Huerta-Cepas J, Dopazo J, Gabaldón T. 2010. ETE: a python Environment for Tree Exploration. *BMC Bioinformatics* 11:24.
- 35 Jackson BC, Thompson DC, Wright MW, McAndrews M, Bernard A, Nebert DW, Vasiliou V. 2011. Update of the human secretoglobin (SCGB) gene superfamily and an example of “evolutionary bloom” of androgen-binding protein genes within the mouse *Scgb* gene superfamily. *Hum. Genomics* 5:691–702.
- Johnson BR, Tsutsui ND. 2011. Taxonomically restricted genes are associated with the evolution of sociality in the honey bee. *BMC Genomics* 12:164.
- 40 Jonca N, Leclerc EA, Caubet C, Simon M, Guerrin M, Serre G. 2011. Corneodesmosomes and corneodesmosin: from the stratum corneum cohesion to the pathophysiology of genodermatoses. *Eur. J. Dermatol.* 21 Suppl 2:35–42.
- Jorge Ruiz-Orera, Pol Verdaguier-Grau, José Luis Villanueva-Cañas, Xavier Messeguer MMA. 2016. Functional and non-functional classes of peptides produced by long non-coding RNAs. *BioRxiv*
- 45

064915.

- Kaessmann H. 2010. Origins, evolution, and phenotypic impact of new genes. *Genome Res.* 20:1313–1326.
- Kaessmann H, Vinckenbosch N, Long M. 2009. RNA-based gene duplication: mechanistic and evolutionary insights. *Nat. Rev. Genet.* 10:19–31.
- Kawasaki K, Lafont A-G, Sire J-Y. 2011. The evolution of milk casein genes from tooth genes before the origin of mammals. *Mol. Biol. Evol.* 28:2053–2061.
- Khalturin K, Hemmrich G, Fraune S, Augustin R, Bosch TCG. 2009. More than just orphans: are taxonomically-restricted genes important in evolution? *Trends Genet.* 25:404–413.
- Kim D, Pertea G, Trapnell C, Pimentel H, Kelley R, Salzberg SL. 2013. TopHat2: accurate alignment of transcriptomes in the presence of insertions, deletions and gene fusions. *Genome Biol.* 14:R36.
- Kleene KC. 2005. Sexual selection, genetic conflict, selfish genes, and the atypical patterns of gene expression in spermatogenic cells. *Dev. Biol.* 277:16–26.
- Knowles DG, McLysaght A. 2009. Recent de novo origin of human protein-coding genes. *Genome Res.* 19:1752–1759.
- Levine MT, Jones CD, Kern AD, Lindfors HA, Begun DJ. 2006. Novel genes derived from noncoding DNA in *Drosophila melanogaster* are frequently X-linked and exhibit testis-biased expression. *Proc. Natl. Acad. Sci. U. S. A.* 103:9935–9939.
- Lindblad-Toh K, Garber M, Zuk O, et al. 2011. A high-resolution map of human evolutionary constraint using 29 mammals. *Nature* 478:476–482.
- McLysaght A, Hurst LD. 2016. Open questions in the study of de novo genes: what, how and why. *Nat. Rev. Genet.* 17:567–578.
- Meredith RW, Janecka JE, Gatesy J, et al. 2011. Impacts of the Cretaceous Terrestrial Revolution and KPg Extinction on Mammal Diversification. *Science* 334:521–524.
- Milde S, Hemmrich G, Anton-Erxleben F, Khalturin K, Wittlieb J, Bosch TCG. 2009. Characterization of taxonomically restricted genes in a phylum-restricted cell type. *Genome Biol.* 10:R8.
- Murphy DN, McLysaght A. 2012. De novo origin of protein-coding genes in murine rodents. *PLoS One* 7:e48650.
- Nayernia K, Adham IM, Burkhardt-Göttges E, Neesen J, Rieche M, Wolf S, Sancken U, Kleene K, Engel W. 2002. Asthenozoospermia in mice with targeted deletion of the sperm mitochondrion-associated cysteine-rich protein (Smcp) gene. *Mol. Cell. Biol.* 22:3046–3052.
- Neme R, Tautz D. 2013. Phylogenetic patterns of emergence of new genes support a model of frequent de novo evolution. *BMC Genomics* 14:117.
- Neme R, Tautz D. 2014. Evolution: dynamics of de novo gene emergence. *Curr. Biol.* 24:R238-40.
- Neme R, Tautz D. 2016. Fast turnover of genome transcription across evolutionary time exposes entire non-coding DNA to de novo gene emergence. *Elife* 5:e09977.
- O’Leary MA, Bloch JJ, Flynn JJ, et al. 2013. The Placental Mammal Ancestor and the Post-K-Pg Radiation of Placentals. *Science* 339:662–667.
- Ohno S. 1970. Evolution by gene duplication. Springer New York
- Ohno S, Epplen JT. 1983. The primitive code and repeats of base oligomers as the primordial protein-encoding sequence. *Proc. Natl. Acad. Sci. U. S. A.* 80:3391–3395.
- Palmieri N, Kosiol C, Schlötterer C. 2014. The life cycle of *Drosophila* orphan genes. *Elife* 3:e01311.
- Pegueroles C, Laurie S, Albà MM. 2013. Accelerated evolution after gene duplication: a time-dependent process affecting just one copy. *Mol. Biol. Evol.* 30:1830-1842.

- Pervouchine DD, Djebali S, Breschi A, et al. 2015. Enhanced transcriptome maps from multiple mouse tissues reveal evolutionary constraint in gene expression. *Nat. Commun.* 6:5903.
- Pich I Roselló O, Kondrashov FA. 2014. Long-term asymmetrical acceleration of protein evolution after gene duplication. *Genome Biol. Evol.* 6:1949–1955.
- 5 Reinhardt JA, Wanjiru BM, Brant AT, Saelao P, Begun DJ, Jones CD. 2013. De novo ORFs in *Drosophila* are important to organismal fitness and evolved rapidly from previously non-coding sequences. *PLoS Genet.* 9:e1003860.
- Ruiz-Orera J, Hernandez-Rodriguez J, Chiva C, Sabidó E, Kondova I, Bontrop R, Marqués-Bonet T, Albà MM. 2015. Origins of De Novo Genes in Human and Chimpanzee. Noonan J, editor. *PLOS Genet.* 11:e1005721.
- 10 Ruiz-Orera J, Messeguer X, Subirana JA, Alba MM. 2014. Long non-coding RNAs as a source of new peptides. *Elife* 3:e03523.
- Samusik N, Krukovskaya L, Meln I, Shilov E, Kozlov AP. 2013. PBOV1 is a human de novo gene with tumor-specific expression that is associated with a positive clinical outcome of cancer. *PLoS One* 8:e56162.
- 15 Saugar JM, Alarcón T, López-Hernández S, López-Brea M, Andreu D, Rivas L. 2002. Activities of polymyxin B and cecropin A-, melittin peptide CA(1-8)M(1-18) against a multiresistant strain of *Acinetobacter baumannii*. *Antimicrob. Agents Chemother.* 46:875–878.
- Schittek B, Hipfel R, Sauer B, et al. 2001. Dermcidin: a novel human antibiotic peptide secreted by sweat glands. *Nat. Immunol.* 2:1133–1137.
- 20 Schlötterer C. 2015. Genes from scratch – the evolutionary fate of de novo genes. *Trends Genet.* 31:215–219.
- Slavoff SA, Mitchell AJ, Schwaib AG, et al. 2013. Peptidomic discovery of short open reading frame-encoded peptides in human cells. *Nat. Chem. Biol.* 9:59–64.
- 25 Smeds L, Künstner A. 2011. ConDeTri--a content dependent read trimmer for Illumina data. *PLoS One* 6:e26314.
- Soumillon M, Necsulea A, Weier M, et al. 2013. Cellular source and mechanisms of high transcriptome complexity in the mammalian testis. *Cell Rep.* 3:2179–2190.
- Stamatoyannopoulos JA, Snyder M, Hardison R, et al. 2012. An encyclopedia of mouse DNA elements (Mouse ENCODE). *Genome Biol.* 13:418.
- 30 Strasser B, Mlitz V, Hermann M, Rice RH, Eigenheer RA, Alibardi L, Tschachler E, Eckhart L. 2014. Evolutionary origin and diversification of epidermal barrier proteins in amniotes. *Mol. Biol. Evol.* 31:3194–3205.
- Tautz D, Domazet-Lošo T. 2011. The evolutionary origin of orphan genes. *Nat. Rev. Genet.* 12:692–702.
- 35 Team R. 2013. R Development Core Team. *R A Lang. Environ. Stat. Comput.*
- Toll-Riera M, Albà MM. 2013. Emergence of novel domains in proteins. *BMC Evol. Biol.* 13:47.
- Toll-Riera M, Bosch N, Bellora N, Castelo R, Armengol L, Estivill X, Albà MM. 2009. Origin of primate orphan genes: a comparative genomics approach. *Mol. Biol. Evol.* 26:603–612.
- Toll-Riera M, Bostick D, Albà MM, Plotkin JB. 2012. Structure and age jointly influence rates of protein evolution. *PLoS Comput. Biol.* 8:e1002542.
- 40 Toll-Riera M, Laurie S, Albà MM. 2011. Lineage-specific variation in intensity of natural selection in mammals. *Mol. Biol. Evol.* 28:383–398.
- Toll-Riera M, Laurie S, Radó-Trilla N, Albà M. 2011. Partial gene duplication and the formation of novel genes. In: Felix Friedberg, editor. *Gene Duplication*. Rijeka: Intech.

- Toll-Riera M, Radó-Trilla N, Martys F, Albà MM. 2012. Role of Low-Complexity Sequences in the Formation of Novel Protein Coding Sequences. *Mol. Biol. Evol.* 29:883–886.
- Torrent M, Di Tommaso P, Pulido D, Nogues M V., Notredame C, Boix E, Andreu D. 2012. AMPA: an automated web server for prediction of protein antimicrobial regions. *Bioinformatics* 28:130–131.
- 5 Trapnell C, Williams BA, Pertea G, Mortazavi A, Kwan G, van Baren MJ, Salzberg SL, Wold BJ, Pachter L. 2010. Transcript assembly and quantification by RNA-Seq reveals unannotated transcripts and isoform switching during cell differentiation. *Nat. Biotechnol.* 28:511–515.
- Vinckenbosch N, Dupanloup I, Kaessmann H. 2006. Evolutionary fate of retroposed gene copies in the human genome. *Proc. Natl. Acad. Sci. U. S. A.* 103:3220–3225.
- 10 Vizcaíno JA, Csordas A, del-Toro N, et al. 2016. 2016 update of the PRIDE database and its related tools. *Nucleic Acids Res.* 44:D447–D456.
- Wissler L, Gadau J, Simola DF, Helmkampf M, Bornberg-Bauer E. 2013. Mechanisms and dynamics of orphan gene emergence in insect genomes. *Genome Biol. Evol.* 5:439–455.
- 15 Wood V, Gwilliam R, Rajandream M-A, et al. 2002. The genome sequence of *Schizosaccharomyces pombe*. *Nature* 415:871–880.
- Wootton JC, Federhen S. 1996. Analysis of compositionally biased regions in sequence databases. *Methods Enzymol.* 266:554–571.
- Wu D-D, Irwin DM, Zhang Y-P. 2011. De novo origin of human protein-coding genes. *PLoS Genet.* 7:e1002379.
- 20 Xie C, Zhang YE, Chen J-Y, et al. 2012. Hominoid-specific de novo protein-coding genes originating from long non-coding RNAs. *PLoS Genet.* 8:e1002942.
- Xu D, Pavlidis P, Thamadilok S, Redwood E, Fox S, Blekhman R, Ruhl S, Gokcumen O. 2016. Recent evolution of the salivary mucin MUC7. *Sci. Rep.* 6:31791.
- 25 Yanai I, Benjamin H, Shmoish M, et al. 2005. Genome-wide midrange transcription profiles reveal expression level relationships in human tissue specification. *Bioinformatics* 21:650–659.
- Yang M, Tang M, Ma X, et al. 2015. AP-57/C10orf99 is a new type of multifunctional antimicrobial peptide. *Biochem. Biophys. Res. Commun.* 457:347–352.
- Yeaman MR, Yount NY. 2007. Unifying themes in host defence effector polypeptides. *Nat. Rev. Microbiol.* 5:727–740.
- 30 Zhang J, Dean AM, Brunet F, Long M. 2004. Evolving protein functional diversity in new genes of *Drosophila*. *Proc. Natl. Acad. Sci. U. S. A.* 101:16246–16250.
- Zhang YE, Long M. 2014. New genes contribute to genetic and phenotypic novelties in human evolution. *Curr. Opin. Genet. Dev.* 29:90–96.
- 35 Zhao L, Saelao P, Jones CD, Begun DJ. 2014. Origin and spread of de novo genes in *Drosophila melanogaster* populations. *Science* 343:769–772.
